# Supplementary material for: A model to study complement involvement in experimental retinal degeneration
Source: PubMed Central journal article supplement (PMC5901466; doi:10.1080/03009734.2018.1431744), 2018-02-13

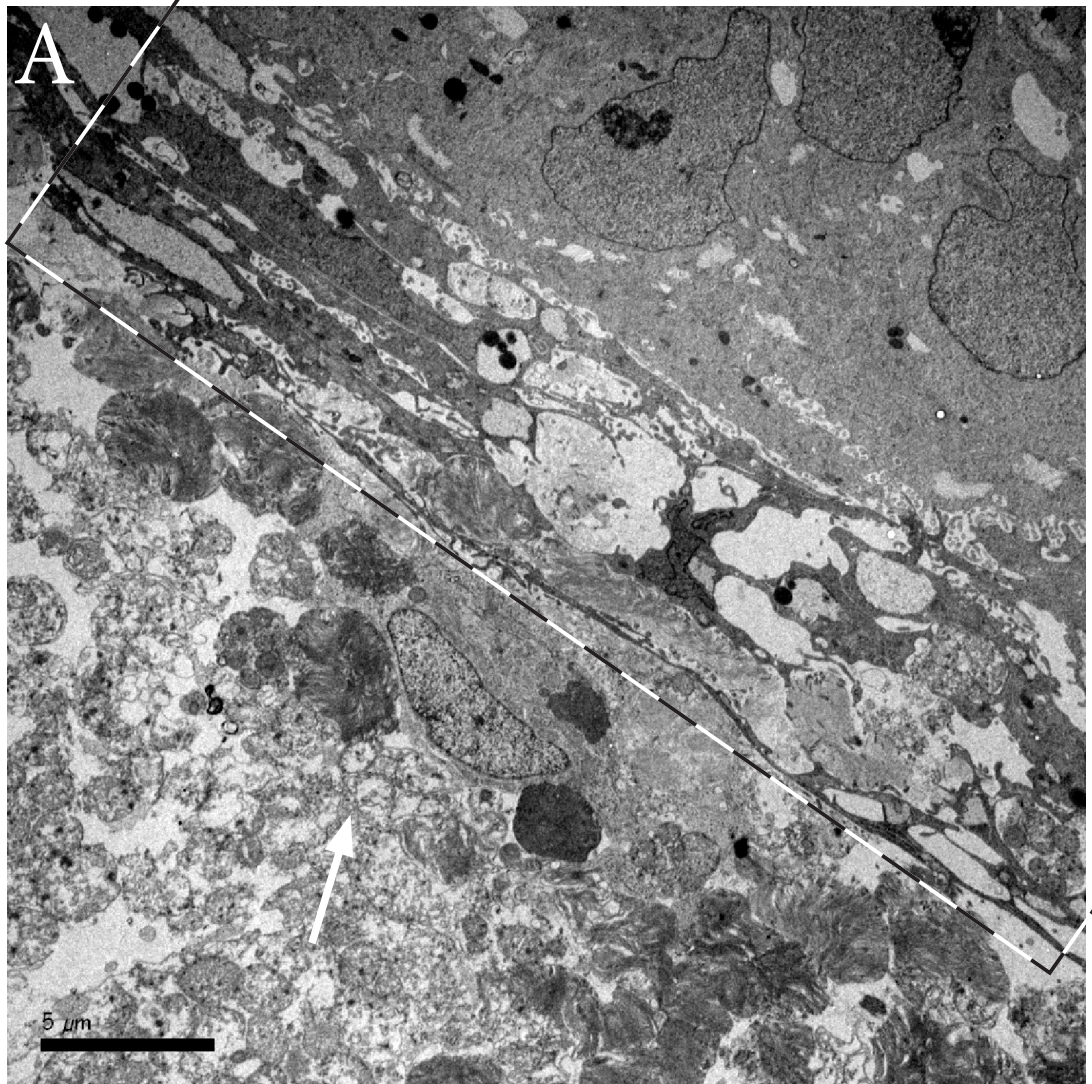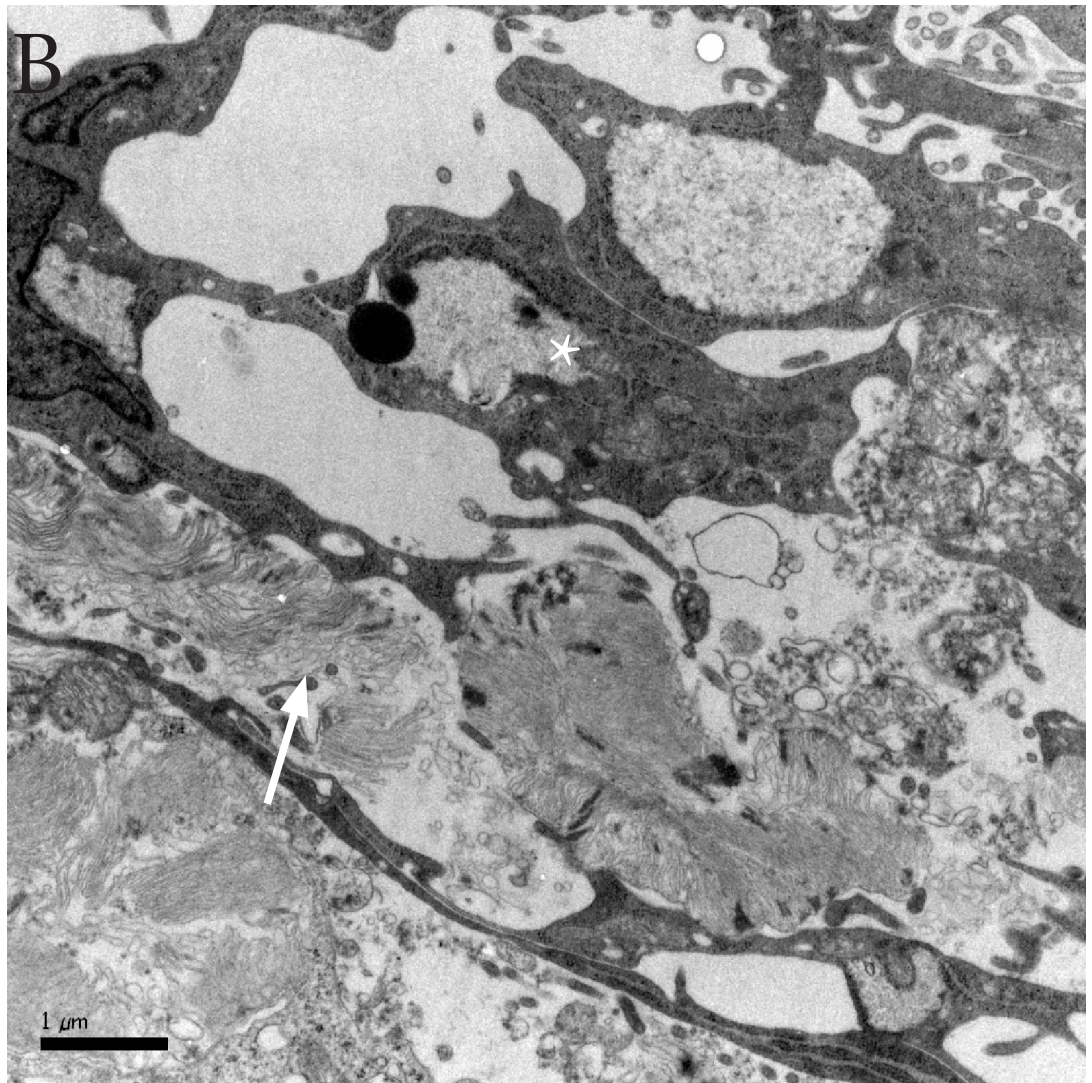

Supplement: IUPS_A_1431744_SM4992.pdf [file IUPS_A_1431744_SM4992.pdf]
